# Supplementary material for: ADHD-related symptoms and attention profiles in the unaffected siblings of probands with autism spectrum disorder: focus on the subtypes of autism and Asperger’s disorder
Source: PubMed Central journal article supplement (PMC5526322; doi:10.1186/s13229-017-0153-9), 2017-07-25
Supplement: 13229_2017_153_MOESM2_ESM.pdf [file 13229_2017_153_MOESM2_ESM.pdf]

**Additional file 2.** Comparison of ADHD-related symptoms and CCPT performance between probands with autism spectrum disorders, unaffected siblings of ASD, and typically-developing controls

| Group                    | ASD<br>(n = 199) | US (n = 199) | TD<br>(n = 196) | F      | P      | Comparison# | <i>Cohen's d</i> |           |            |
|--------------------------|------------------|--------------|-----------------|--------|--------|-------------|------------------|-----------|------------|
|                          |                  |              |                 |        |        |             | ASD:<br>TD       | US:<br>TD | ASD:<br>US |
| <b>SNAP-IV</b>           |                  |              |                 |        |        |             |                  |           |            |
| Inattentive              | 15.81±6.57       | 6.43±6.00    | 5.46±4.65       | 140.52 | <.0001 | ASD>US,TD   | 1.82             | 0.18      | 1.49       |
| Hyperactive/impulsive    | 11.07±6.99       | 4.10±4.95    | 2.92±3.93       | 93.49  | <.0001 | ASD>US,TD   | 1.44             | 0.26      | 1.15       |
| Oppositional             | 9.62±6.12        | 6.24±5.26    | 3.60±3.89       | 49.19  | <.0001 | ASD>US>TD   | 1.17             | 0.57      | 0.59       |
| <b>Focused attention</b> |                  |              |                 |        |        |             |                  |           |            |
| Omission                 | 16.84±27.80      | 7.62±8.72    | 6.35±7.41       | 22.82  | <.0001 | ASD>US,TD   |                  |           |            |
| RT SE                    | 435.98±142.90    | 407.51±92.08 | 381.04±67.13    | 28.33  | <.0001 | ASD>US,TD   |                  |           |            |
| Variability              | 13.79±11.11      | 9.79±6.06    | 8.63±5.50       | 16.63  | <.0001 | ASD>US,TD   |                  |           |            |
| Perseveration            | 13.93±17.66      | 7.73±13.12   | 7.02±14.31      | 11.55  | <.0001 | ASD>US,TD   |                  |           |            |
| Detectability            | 0.33±0.39        | 0.47±0.38    | 0.43±0.36       | 6.62   | 0.0014 | ASD<US,TD   |                  |           |            |

---

| <b>Cognitive impulsivity</b> |               |              |              |       |        |           |
|------------------------------|---------------|--------------|--------------|-------|--------|-----------|
| Commission                   | 23.51±8.83    | 19.94±8.42   | 20.85±8.31   | 8.01  | 0.0004 | ASD>US,TD |
| Reaction time                | 435.98±142.90 | 407.51±92.08 | 381.04±67.13 | 20.51 | <.0001 | ASD>US>TD |
| Response style               | 0.94±2.64     | 1.65±9.62    | 0.58±1.25    | 1.68  | 0.1873 | -         |
| <b>Sustained attention</b>   |               |              |              |       |        |           |
| Hit RT block change          | 0.01±0.05     | 0.01±0.03    | 0.01±0.03    | 1.36  | 0.2564 | -         |
| Hit SE block change          | 0.08±0.12     | 0.07±0.11    | 0.04±0.09    | 4.51  | 0.0113 | ASD>TD    |
| <b>Vigilance</b>             |               |              |              |       |        |           |
| Hit RT ISI change            | 0.09±0.08     | 0.08±0.05    | 0.08±0.04    | 4.36  | 0.0132 | ASD>US,TD |
| Hit SE ISI change            | 0.12±0.19     | 0.11±0.16    | 0.10±0.16    | 1     | 0.3667 | -         |

---

# Bonferroni correction  $p < 0.05$

**Abbreviation:** ASD=autism spectrum disorders; ISI=inter-stimulus interval; RT=Reaction time; SE=Standard error; TD=typically-developing controls; US=unaffected siblings of ASD
