# Supplementary material for: ADHD-related symptoms and attention profiles in the unaffected siblings of probands with autism spectrum disorder: focus on the subtypes of autism and Asperger’s disorder
Source: PubMed Central journal article supplement (PMC5526322; doi:10.1186/s13229-017-0153-9), 2017-07-25
Supplement: 13229_2017_153_MOESM3_ESM.pdf [file 13229_2017_153_MOESM3_ESM.pdf]

**Additional file 3.** Comparison of CCPT performance between probands with autism, unaffected siblings of autism probands, and typically-developing controls

| <b>Group</b>                 | <b>Autism</b><br>(n =122) | <b>US of autism</b><br>(n = 122) | <b>TD</b><br>(n = 196) | <b>F</b> | <b>P</b> | <b>Comparison#</b> |
|------------------------------|---------------------------|----------------------------------|------------------------|----------|----------|--------------------|
| <b>Focused attention</b>     |                           |                                  |                        |          |          |                    |
| Omission                     | 20.68±31.56               | 7.16±8.42                        | 6.35±7.41              | 27.80    | <.001    | A>US,TD            |
| RT SE                        | 15.71±12.55               | 9.59±5.72                        | 8.63±5.50              | 33.05    | <.001    | A>US,TD            |
| Variability                  | 29.84±25.92               | 18.22±15.70                      | 16.89±16.54            | 17.96    | <.001    | A>US,TD            |
| Perseveration                | 16.89±19.19               | 6.73±10.34                       | 7.02±14.31             | 15.56    | <.001    | A>US,TD            |
| Detectability                | 0.30±0.40                 | 0.48±0.40                        | 0.43±0.36              | 5.88     | 0.004    | A<US,TD            |
| <b>Cognitive impulsivity</b> |                           |                                  |                        |          |          |                    |
| Commission                   | 24.32±8.94                | 19.39±8.55                       | 20.85±8.31             | 8.00     | <.001    | A>US,TD            |
| Reaction time                | 461.20±163.47             | 412.46±96.85                     | 381.04±67.13           | 24.49    | <.001    | A>US,TD            |
| Response style               | 1.16±3.35                 | 2.35±12.26                       | 0.58±1.25              | 2.54     | 0.083    | -                  |

---

| <b>Sustained attention</b> |           |           |           |      |       |   |
|----------------------------|-----------|-----------|-----------|------|-------|---|
| Hit RT block<br>change     | 0.01±0.05 | 0.01±0.03 | 0.01±0.03 | 0.43 | 0.652 | - |
| Hit SE block<br>change     | 0.07±0.12 | 0.07±0.10 | 0.04±0.09 | 3.39 | 0.037 | - |
| <b>Vigilance</b>           |           |           |           |      |       |   |
| Hit RT ISI<br>change       | 0.09±0.09 | 0.08±0.05 | 0.08±0.04 | 2.21 | 0.114 | - |
| Hit SE ISI<br>change       | 0.12±0.19 | 0.11±0.16 | 0.10±0.16 | 0.23 | 0.793 | - |

---

# Bonferroni correction  $p < 0.05$

**Abbreviation:** ISI=inter-stimulus interval; RT=Reaction time; SE=Standard error; TD=typically-developing controls; US=unaffected siblings of autism probands
