# Supplementary material for: ADHD-related symptoms and attention profiles in the unaffected siblings of probands with autism spectrum disorder: focus on the subtypes of autism and Asperger’s disorder
Source: Springer Nature journal article supplement (doi:10.1186/s13229-017-0153-9), 2017-07-25
Supplement: MOESM1 [file 13327012]

**Additional file 1.** Autistic symptoms of probands (autism and Asperger's disorder (AS)), unaffected siblings (US) and typically-developing controls (TD)

| <b>Group</b>                                        | <b>Autism</b><br>( <i>n</i> =122) | <b>AS</b><br>( <i>n</i> = 77) | <b>US of autism</b><br>( <i>n</i> = 122) | <b>US of AS</b><br>( <i>n</i> = 77) | <b>TD</b><br>( <i>n</i> = 196) | <b>F</b> | <b>P</b> |
|-----------------------------------------------------|-----------------------------------|-------------------------------|------------------------------------------|-------------------------------------|--------------------------------|----------|----------|
| <b>Social Communication Questionnaire</b>           |                                   |                               |                                          |                                     |                                |          |          |
| Social deficits                                     | 11.46±5.55                        | 10.50±5.53                    | 1.92±2.66                                | 2.69±2.57                           | 2.53±2.62                      | 127.80   | <.001    |
| Communication deficits                              | 4.45±2.13                         | 3.82±1.81                     | 0.70±1.10                                | 0.88±1.43                           | 0.61±1.09                      | 138.83   | <.001    |
| Stereotyped behaviors                               | 5.51±2.73                         | 4.64±2.71                     | 0.89±1.28                                | 1.38±1.43                           | 0.89±1.42                      | 107.00   | <.001    |
| Total scores                                        | 20.16±7.23                        | 17.86±7.23                    | 3.30±3.53                                | 4.74±4.40                           | 3.80±3.53                      | 219.98   | <.001    |
| <b>Autism Diagnostic Interview- Revised (ADI-R)</b> |                                   |                               |                                          |                                     |                                |          |          |
| <b>Current:</b>                                     |                                   |                               |                                          |                                     |                                |          |          |
| A: Social deficits                                  | 10.28±4.94                        | 10.05±4.35                    |                                          |                                     |                                | 0.11     | 0.742    |
| B: Communication (verbal)                           | 11.81±4.62                        | 11.14±4.16                    |                                          |                                     |                                | 0.00     | 0.984    |
| B: Communication (non-verbal)                       | 5.64±3.21                         | 5.73±2.53                     |                                          |                                     |                                | 0.34     | 0.564    |
| C: Restricted interests and stereotyped behaviors   | 5.36±2.67                         | 5.36±2.68                     |                                          |                                     |                                | 0.01     | 0.909    |

**Severe:**

|                                                   |            |            |       |       |
|---------------------------------------------------|------------|------------|-------|-------|
| A: Social deficits                                | 22.52±5.31 | 18.69±6.70 | 19.76 | <.001 |
| B: Communication (verbal)                         | 16.55±3.69 | 13.55±4.33 | 27.05 | <.001 |
| B: Communication (non-verbal)                     | 8.51±2.73  | 7.00±3.12  | 12.83 | <.001 |
| C: Restricted interests and stereotyped behaviors | 7.32±2.38  | 6.65±2.80  | 3.22  | 0.074 |

---

**Note:** Only a portion of probands with autism spectrum disorders have ADIR B subscores (N=47 in probands with autism, N=22 in probands with Asperger's disorder). Post hoc analysis showed that autism probands showed more autistic traits than their unaffected siblings and TD in each autistic traits (social deficits, communication deficits, and stereotyped behaviors). Similarly, AS probands showed more autistic traits than their unaffected siblings and TD. AS=Asperger's disorder; TD=typically-developing controls; US=unaffected siblings
