# Supplementary material for: ADHD-related symptoms and attention profiles in the unaffected siblings of probands with autism spectrum disorder: focus on the subtypes of autism and Asperger’s disorder
Source: Springer Nature journal article supplement (doi:10.1186/s13229-017-0153-9), 2017-07-25

**Supplementary Figure 1.** Selected Conners' Continuous Performance Test indexes showing that probands with Asperger's disorder (AS) performed differently from typically-developing youths (TD) and their unaffected siblings performed in the intermediate position: (a) Omission, Reaction time standard errors (RT SE), and Variability; (b) Reaction time; (c) Hit reaction time standard error (Hit SE) block change and Hit reaction time inter-stimulus (Hit RT ISI) change (Note. The index of Hit RT ISI didn't pass False Discovery Rate correction.)

(a)

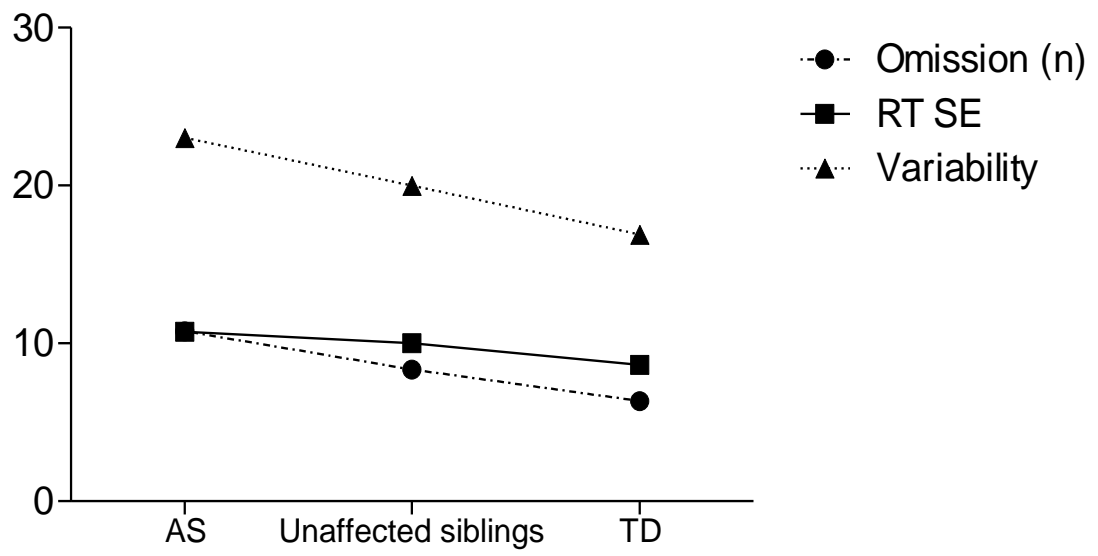

(b)

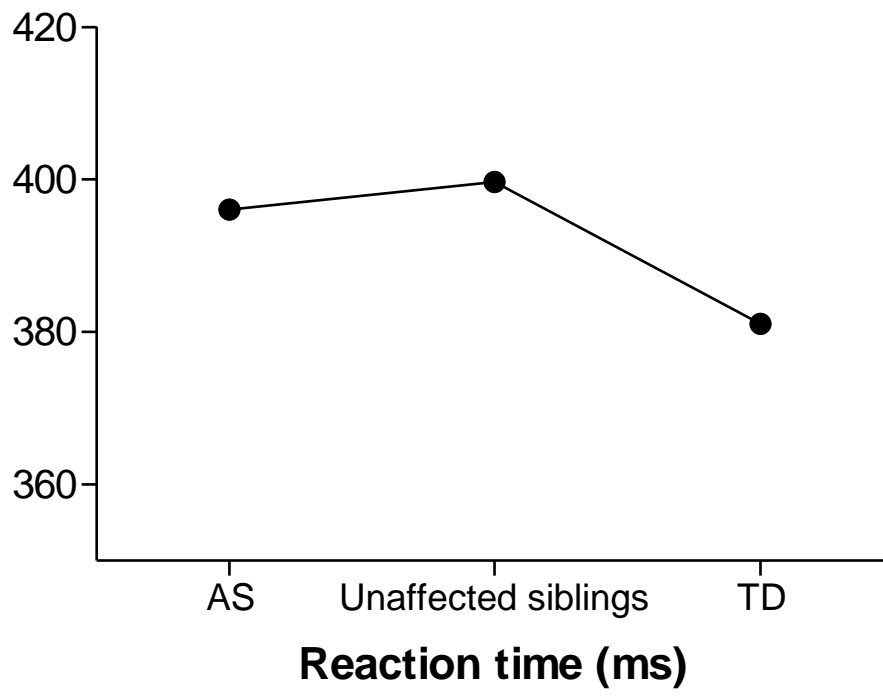

(c)

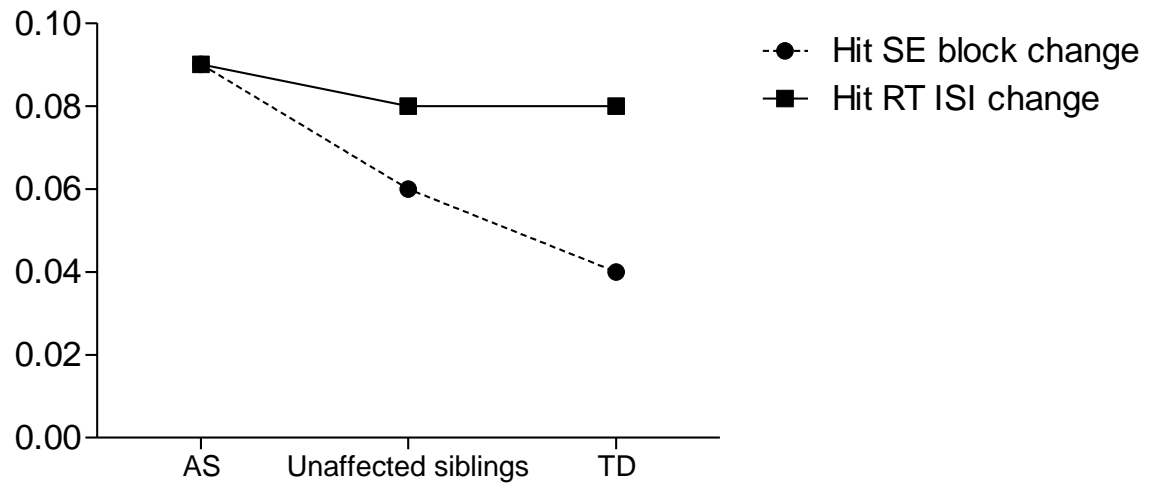

Supplement: MOESM4 [file 13327012]
